# Supplementary material for: Analysis of the gut microbiota in children with gastroesophageal reflux disease using metagenomics and metabolomics
Source: PubMed Central journal article supplement (PMC10613033; doi:10.3389/fcimb.2023.1267192), 2023-10-13

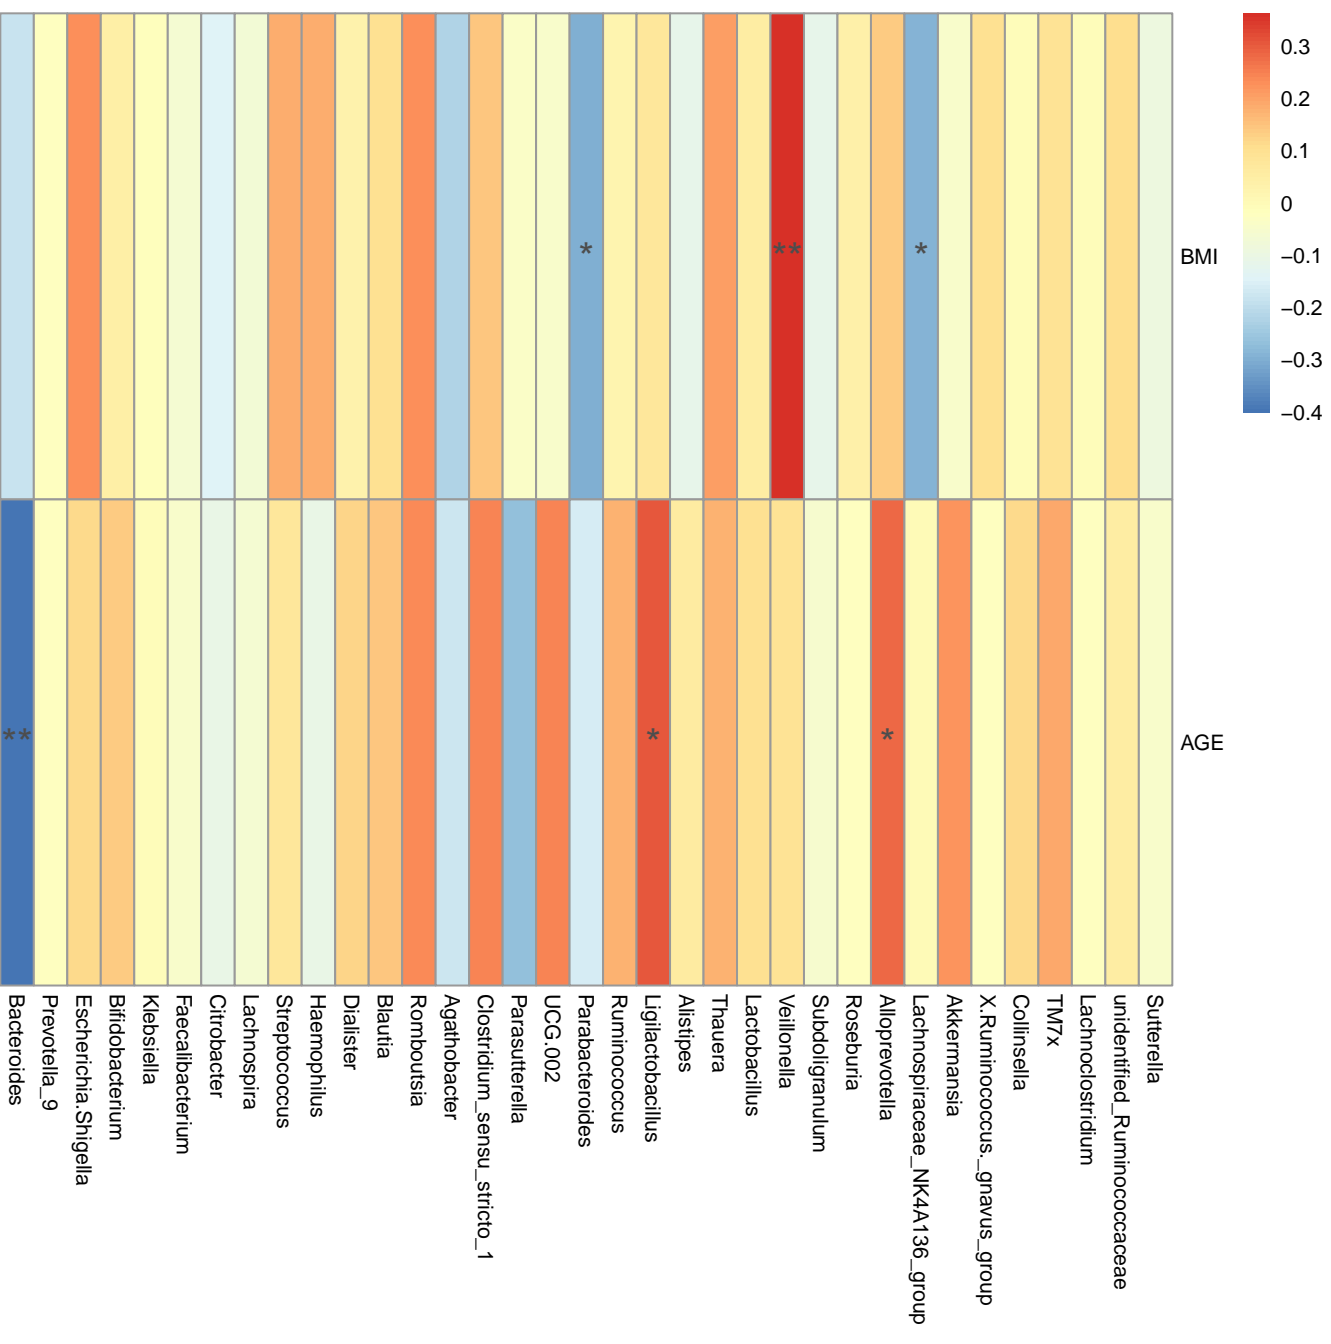

Supplement: DataSheet_1.pdf [file DataSheet_1.pdf]
